# Supplementary material
Source: ML conference proceedings conference paper supplement (https://proceedings.neurips.cc/paper_files/paper/2008/hash/a49e9411d64ff53eccfdd09ad10a15b3-Abstract.html)
Supplement: Supplementary file [file a49e9411d64ff53eccfdd09ad10a15b3-Supplemental.zip]

---

# Relative Performance Guarantees for Approximate Inference in Latent Dirichlet Allocation

---

Indraneel Mukherjee      David M. Blei

Department of Computer Science  
Princeton University  
35 Olden Street  
Princeton, NJ 08540  
{imukherj, blei}@cs.princeton.edu

## Appendix

**Proof of Lemma 1:** By choice  $q$  minimizes the collapsed variational free energy, so that by equation (2) of our paper,

$$\text{CVB}(\vec{x}) = \mathcal{F}(\vec{x}, q) = \mathbb{E}_{q(\vec{z})} \log \frac{q(\vec{z})}{p(\vec{z}, \vec{x})}. \quad (1)$$

From a result due to [1], [2], [3], the choice of parameters  $\vec{\gamma}$  that minimize the variational free energy  $\mathcal{F}(\vec{x}, q, \vec{\gamma})$  (defined in Section 2 of the paper) are given by

$$\gamma_j \triangleq \sum_i q_i(z), \forall j \in [k]. \quad (2)$$

If VB chose variational parameters as  $\phi = q$  and  $\vec{\gamma}$  as in (2), then it approximates the posterior  $p(\vec{z}, \theta | \vec{x})$  by  $q(\vec{z})q(\theta)$  where  $q(\theta)$  is the Dirichlet prior with parameters  $\vec{\gamma}$ , and maybe written as

$$q(\theta) \triangleq \frac{1}{B(\vec{\gamma} + \vec{\alpha})} \prod_z \theta_z^{\gamma_z + \alpha_z - 1}, \quad (3)$$

Here  $B(\vec{\gamma} + \vec{\alpha})$  is the normalization constant. In general, for Dirichlet parameters  $\vec{\nu}$ ,  $B(\vec{\nu})$  is

$$B(\vec{\nu}) = \frac{\prod_j \Gamma(\nu_j)}{\Gamma(\sum_j \nu_j)}. \quad (4)$$

Since VB chooses variational parameters to minimize its free energy, we have by equation (1) of our paper,

$$\text{VB}(\vec{x}) \leq \mathcal{F}(\vec{x}, q, \vec{\gamma}) = \mathbb{E}_{q(\vec{z})q(\theta)} \log \frac{q(\vec{z})q(\theta)}{p(\vec{z}, \vec{x}, \theta)}.$$

Expanding the above expression by the chain rule for computing relative entropy [4],

$$\text{VB}(\vec{x}) \leq \mathbb{E}_{q(\vec{z})} \log \frac{q(\vec{z})}{p(\vec{z}, \vec{x})} + \mathbb{E}_{q(\vec{z})} \mathbb{E}_{q(\theta)} \log \frac{q(\theta)}{p(\theta | \vec{z}, \vec{x})}$$

Combining (1) with the above

$$\text{VB}(\vec{x}) - \text{CVB}(\vec{x}) \leq \mathbb{E}_{q(\vec{z})} \mathbb{E}_{q(\theta)} \log \frac{q(\theta)}{p(\theta | \vec{z}, \vec{x})}. \quad (5)$$

We will bound the right side of (5). From the conjugacy of the multinomial and Dirichlet distributions, we know that  $p(\theta | \vec{z}, \vec{x})$  is given by

$$p(\theta | \vec{z}, \vec{x}) = \frac{1}{B(\vec{m} + \vec{\alpha})} \prod_j \theta_j^{m_j + \alpha_j - 1},$$

where  $m_j = m_j(\vec{z})$  denotes the number of occurrences of topic  $j$  in the collection of topics  $\vec{z}$ . We denote the collection  $(m_1, \dots, m_k)$  by the vector  $\vec{m}$ . Plugging the above expression for  $p(\theta|\vec{z}, \vec{x})$ , and (3) for  $q(\theta)$ , into the right side of (5),

$$\mathbb{E}_{q(\vec{z})} \mathbb{E}_{q(\theta)} \log \frac{q(\theta)}{p(\theta|\vec{x}, \vec{z})} = \mathbb{E}_{q(\vec{z})} \left[ \log \frac{B(\vec{m} + \vec{\alpha})}{B(\vec{\gamma} + \vec{\alpha})} \right] + \mathbb{E}_{q(\vec{z})} \left[ \sum_j (\gamma_j - m_j) (\mathbb{E}_{q(\theta)} \log \theta_j) \right].$$

We will show that

$$\mathbb{E}_{q(\vec{z})} \left[ \sum_z (\gamma_z - m_z) (\mathbb{E}_{q(\theta)} \log \theta_z) \right] = 0 \quad (6)$$

and

$$\mathbb{E}_{q(\vec{z})} \left[ \log \frac{B(\vec{m} + \vec{\alpha})}{B(\vec{\gamma} + \vec{\alpha})} \right] = \sum_j (\mathbb{E}_{q(\vec{z})} [\log \Gamma(m_j + \alpha_j)] - \log \Gamma(\gamma_j + \alpha_j)), \quad (7)$$

which will imply

$$\mathbb{E}_{q(\vec{z})} \mathbb{E}_{q(\theta)} \left[ \log \frac{q(\theta)}{p(\theta|\vec{x}, \vec{z})} \right] = \sum_j (\mathbb{E}_{q(\vec{z})} [\log \Gamma(m_j + \alpha_j)] - \log \Gamma(\gamma_j + \alpha_j)),$$

and complete the proof, by (5).

To see (6), observe that  $m_z = \sum_i \mathbf{1}[z_i = z]$  so that  $\mathbb{E}_{q(\vec{z})} m_z = \sum_i q_i(z) = \gamma_z$ . Hence, when we take expectation under  $q(\vec{z})$ , each summand disappears. By linearity of expectation, the entire sum is zero.

$$\begin{aligned} & \mathbb{E}_{q(\vec{z})} [(\gamma_z - m_z) \mathbb{E}_{q(\theta)} \log \theta_z] \\ &= (\mathbb{E}_{q(\theta)} \log \theta_z) (\mathbb{E}_{q(\vec{z})} (\gamma_z - m_z)) \\ &= (\mathbb{E}_{q(\theta)} \log \theta_z) (\gamma_z - \mathbb{E}_{q(\vec{z})} m_z) \\ &= 0. \end{aligned}$$

To show (7), we first use (4) to evaluate

$$\begin{aligned} \log \frac{B(\vec{m} + \vec{\alpha})}{B(\vec{\gamma} + \vec{\alpha})} &= \sum_j (\log \Gamma(m_j + \alpha_j) - \log \Gamma(\gamma_j + \alpha_j)) \\ &+ \log \Gamma \left( \sum_j \gamma_j + \sum_j \alpha_j \right) - \log \Gamma \left( \sum_j m_j + \sum_j \alpha_j \right). \end{aligned}$$

From the definitions of  $\gamma_j$  (2), and  $m_j$ , we have  $\sum_j \gamma_j = \sum_j m_j = m$  so that the last two terms in the above expression disappear. Taking expectations over  $q(\vec{z})$  now yields (7).  $\square$

**Proof of Lemma 2:** Let  $F(q_1, \dots, q_m)$  denote the expectation  $\mathbb{E}[f(X_1 + \dots + X_m)]$ . Using iterated expectation we may rewrite

$$\begin{aligned} F(q_1, \dots, q_m) &= \sum_{X_1, X_2} \Pr(X_1, X_2) \mathbb{E}[f(X_1 + \dots + X_m) | X_1, X_2] \\ &= \sum_{x_1, x_2} \Pr(X_1 = x_1, X_2 = x_2) \mathbb{E}[f(X_3 + \dots + X_m)]. \end{aligned}$$

By independence,  $\Pr(X_1 = x_1, X_2 = x_2) = \Pr(X_1 = x_1) \Pr(X_2 = x_2)$ . Also, each random variable  $X_i$  takes 0, 1 values, and the probabilities are given by  $\Pr(X_i = 1) = q_i, \Pr(X_i = 0) = 1 - q_i$ . Define random variable  $Y = X_3 + \dots + X_m$ . Using these facts in the previous equation,

$$\begin{aligned} F(q_1, \dots, q_m) &= (1 - q_1)(1 - q_2) \mathbb{E}[f(Y)] + q_1 q_2 \mathbb{E}[f(2 + Y)] \\ &+ \mathbb{E}[f(1 + Y)](q_1(1 - q_2) + q_2(1 - q_1)) \\ &= (q_1 + q_2) (\mathbb{E}[f(1 + Y)] - \mathbb{E}[f(Y)]) \\ &+ q_1 q_2 (\mathbb{E}[f(Y)] + \mathbb{E}[f(2 + Y)] - 2\mathbb{E}[f(1 + Y)]). \end{aligned}$$

Fix  $q_3, \dots, q_m$ . Since the  $q_i$ 's sum to a fixed value, fixing implies  $q_1 + q_2$  is a constant. Note  $\mathbb{E}[f(Y)], \mathbb{E}[f(Y+1)], \mathbb{E}[f(Y+2)]$  are constants independent of  $q_1, q_2$ . Maximizing  $F$  is now equivalent to maximizing the second term of the right side of the last equation. By linearity of expectation,  $\mathbb{E}[f(Y)] + \mathbb{E}[f(2+Y)] - 2\mathbb{E}[f(1+Y)] = \mathbb{E}[f(Y) + f(2+Y) - 2f(1+Y)]$ . Since  $f$  is convex, the previous term is non-negative. Thus we need to maximize  $q_1 q_2$  under the constraint that their sum is fixed. The optimum choice is  $q_1 = q_2$ .

Starting from a choice of  $q_1, \dots, q_m$  that maximizes  $F$ , we may, by our arguments, set the minimum and maximum of the  $q_i$ 's, say  $q_1$  and  $q_2$ , to a common value  $(q_1 + q_2)/2$ , without decreasing  $F$ . This decreases the potential  $\Phi(q_1, \dots, q_m) \triangleq \sum_{i,j} |q_i - q_j|$  of the optimal solution by a factor of at least  $(1 - \frac{1}{m^2})$ . By repeating this process, we can find optimal solutions with arbitrarily small potential. Continuity of  $F$  now implies a solution with zero potential is optimal. We end by observing that zero potential is achieved only by  $q_1 = \dots = q_m = \frac{\gamma}{m}$ .

□

**Proof of Lemma 3:** Assume without loss of generality  $q \neq 0$ . Let  $\mu = mq$  be the mean. Define

$$f(c) \triangleq \mathbb{E} [\log \Gamma(X) | (X - \mu) \in [-c\sqrt{m}, c\sqrt{m}]].$$

Using the following concentration bound

$$\Pr[|X - \mu| > r] < 2e^{-r^2/2m} \quad (8)$$

we have

$$\mathbb{E} [\log \Gamma(X + a)] \leq f(c) + 2e^{-c^2/2} \log \Gamma(m + a). \quad (9)$$

Now

$$f(c) = \log \Gamma(\mu + a) + \sum_{i=1}^{c\sqrt{m}} \{\Pr(\mu - i) \log \Gamma(\mu - i + a) + \Pr(\mu + i) \log \Gamma(\mu + i + a)\}. \quad (10)$$

We will first obtain bounds on each summand term. Using  $\Gamma(x+1) = x\Gamma(x)$ , we get

$$\begin{aligned} \log \Gamma(\mu + a + i) &= \log \Gamma(\mu + a) + \sum_{r=0}^{i-1} \log(\mu + a + r) \\ &= \log \Gamma(\mu + a) + i \log(\mu + a) + \sum_{r=0}^{i-1} \log(1 + \frac{r}{\mu + a}). \end{aligned}$$

From  $1 + x \leq \exp(x)$ , we may upper-bound the last summation by

$$\sum_{r=0}^{i-1} \frac{r}{\mu + a} \leq \frac{i^2}{2(\mu + a)}.$$

Therefore we get

$$\log \Gamma(\mu + a + i) \leq \log \Gamma(\mu + a) + i \log(\mu + a) + \frac{i^2}{2(\mu + a)}. \quad (11)$$

Similarly, we can get

$$\log \Gamma(\mu + a - i) = \log \Gamma(\mu + a) - i \log(\mu + a) - \sum_{r=1}^i \log(1 - \frac{r}{\mu + a}).$$

This time we will use  $-\log(1 - x) \leq \log(1 + 2x) \leq 2x$ ; but this only holds in the range  $x \in [0, \frac{1}{2})$ . Since in our case  $x \leq \frac{c\sqrt{m}}{mq+a}$ , for this to be applicable it suffices if  $m$  is at least  $\frac{4c^2}{q^2}$ . We can now bound

$$\log \Gamma(\mu + a - i) \leq \log \Gamma(\mu + a) - i \log(\mu + a) + \frac{i^2}{\mu + a} + \frac{i}{\mu + a}. \quad (12)$$

Using (11) and (12), we can upper-bound each summand in (10) by

$$\begin{aligned} & \log \Gamma(\mu + a) \{ \Pr(\mu + i) + \Pr(\mu - i) \} \\ & + \log(\mu + a) \{ \Pr(\mu + i)i - \Pr(\mu - i)i \} + \frac{3i^2 + i}{\mu + a} \{ \Pr(\mu + i) + \Pr(\mu - i) \}. \end{aligned}$$

Summing up the first term over  $i$  we get at most  $\log \Gamma(\mu + a)$ . The second term becomes at most  $\log(\mu + a)m \Pr(|X - \mu| > c\sqrt{m})$  since the mean is  $\mu$ . Finally, the third term is at most three times the sum of the variance,  $\mu(1 - q)$ , and a term smaller than the variance, divided by  $\mu + a$ . Combining, and using the concentration bound in (8) we get

$$f(c) \leq \log \Gamma(\mu + a) + O(1 - q) + \frac{c}{\sqrt{m}} + 2e^{-c^2/2}m \log m.$$

Choosing  $c = 2\sqrt{\log m}$  and plugging into (9), we get

$$\mathbb{E} [\log \Gamma(X + a)] \leq \log \Gamma(\mu + a) + O(1 - q) + o(1)$$

with  $o(1) = O(\sqrt{\frac{\log m}{m}})$ . With this choice of  $c$ , the required lower bound on  $m$  is  $1/q^{2+o(1)}$ .

□

## References

- [1] M. Beal. *Variational Algorithms for approximate Bayesian inference*. PhD thesis, University College London, 2003.
- [2] E. Xing, M. Jordan, and S. Russell. A generalized mean field algorithm for variational inference in exponential families. In *Proceedings of the 19th Conference on Uncertainty in Artificial Intelligence*, 2003.
- [3] C. Bishop, D. Spiegelhalter, and J. Winn. VIBES: A variational inference engine for Bayesian networks. In S. Becker, S. Thrun, and K. Obermayer, editors, *NIPS 15*, pages 777–784. MIT Press, Cambridge, MA, 2003.
- [4] T. Cover and J. Thomas. *Elements of Information Theory*. Wiley-Interscience, August 1991.
